# Supplementary material for: Vaccination against Oncoproteins of HPV16 for Noninvasive Vulvar/Vaginal Lesions: Lesion Clearance Is Related to the Strength of the T-Cell Response
Source: Oxford University Press journal article supplement (doi:10.1158/1078-0432.ccr-15-2594), 2016-01-26
Supplement: 10780432ccr152594-sup-157436_1_supp_3265101_nz72x4.docx [file 10780432ccr152594-sup-157436_1_supp_3265101_nz72x4.docx]

**Supplementary Appendix**

Supplemental to: van Poelgeest M.I.E., Welters M.J.P., Vermeij R. *et al.,* **Vaccination against oncoproteins of HPV16 for non-invasive vulvar/vaginal lesions: lesion clearance is related to the strength of the T-cell response**

**Supplementary methods**

The authors acknowledge the importance for giving the minimal information about T-cell assays (MIATA)(1).

**Cell samples.** Venous (90 mL) blood samples were drawn and collected in sodium-heparin collection tubes (Vacuette; Greiner, Alphen a/d Rijn, The Netherlands) and 8 mL in a clotting tube (Vacuette) at baseline, at 3 weeks after the second vaccination (just prior to third vaccination) and 3 weeks after the fourth (or last) vaccination. Peripheral blood mononuclear cells (PBMCs) were isolated by Ficoll density gradient centrifugation of the heparinized blood, washed in Phosphate Buffered Saline (PBS; B.Braun, Melsungen, Germany), resuspended in cold Fetal Calf Serum (FCS; PAA Laboratories, Pashing, Austria), stored on ice for 15 minutes before drop-wise the freezing medium (80% FCS and 20% dimethyl sulfoxide (DMSO; Sigma, St.Louis, USA)) was added to cryopreserve the PBMCs using a controlled freezing machine (IceCube 1810, Cryo Solutions 's-Hertogenbosch, The Netherlands) according to standard operating procedures (SOPs). PBMCs were stored in equal aliquots at 10x106 cells per vial in the vapor phase of liquid nitrogen until use. The blood in clotting tube was taken along in the centrifugation step during the Ficoll step after which the serum could be harvested and used for the lymphocyte stimulation test (LST). The remaining serum was aliquoted (1 mL/vial) and stored at -20oC until use.

**Antigens.**For the screening of HPV16-specific CD4+ T-cell responses the previously reported four peptide pools of HPV16 E6 and two peptide pools of HPV16 E7 were used (2, 3) These peptides consist of 22 amino acids (aa) with 12 aa overlap. The HPV16-specific CD8+ T-cell responses were analyzed by use of 15 peptide pools for HPV16 E6 and nine peptide pools for HPV16 E7, each consisting of 10 aa peptides (overlap 9 aa) pooled for 10 subsequent peptides (3). Memory Response Mix (MRM; 50x) contains 0.75/mL Limus Flocculentius tetanus toxoid (Dutch Vaccine Institute, Bilthoven, the Netherlands), 5 μg/mL Mycobacterium tuberculosis (Statens Serum Institute, Copenhagen, Denmark) and 0.015% Candida (HAL Allergy, Leiden, the Netherlands).

**Lymphocyte stimulation test.** The LST was conducted as described previously (2, 3). In short, freshly isolated PBMCs were tested in eigth replicate wells (15x104 cells/well) against the six peptide pools of HPV16. Medium only (IMDM plus 10% autologous serum) and MRM are taken along as negative and positive control, respectively. On day 6, 50 µl/well supernatant was harvested, pooled and stored at -20oC until cytokine analysis. The cells were pulsed with [3H]thymidine (Perkin Elmer, Groningen, the Netherlands) overnight. The mean plus 3 x standard deviation (SD) of the eight cells in medium only wells (negative control) were calculated and used as cutoff value. A stimulation index (SI), which is the mean of eight test wells divided by the mean of negative control, of 3 or higher and when the counts of six out of eight replicates were above the cutoff value is defined as a positive response. A 3-fold increase in SI above baseline sample indicates a vaccine-induced response.

**Cytometric Bead Array.**The cytokines (IFNγ, TNFα, IL-10, IL-5, IL-4 and IL-2) were measured using Th1/Th2 inflammation cytometric bead array (CBA) kit according to the manufacturer’s procedure (BD Bioscience) and previously reports (2, 3). A cytokine level was defined positive when above the manufacturer’s given cutoff value of 20 pg/ml and twice that of the negative control. A vaccine-induced response was defined as 3-fold above baseline sample.

**4-days IFNγ**-**ELISPOT.**The 4-days IFNγ-ELISPOT assay was conducted as described previously (2, 3). Briefly, PBMCs were thawed, seeded at 1-2 x 106 cells/well in 24-wells plate and stimulated for 4 days with the 22-aa peptides (5 µg/ml per peptide) or MRM. Cells in medium served as negative control. Then, the cells were harvested, counted and seeded in quadruplicate wells (100,000 cells/well in 100 µl X-Vivo 15 medium; Lonza, Verviers, Belgium) in the with anti-human IFNγ antibody (5 µg/ml Mab-1-D1K in PBS, Mabtech, Nacka Strand, Sweden) coated ELISPOT plates (MAHAS4510, Millipore, Amsterdam, the Netherlands) to be incubated overnight at 37oC in the incubator (5% CO2, 90% humidity). The ELISPOT plates were washed (and between every following step) with PBS+0.05% Tween (Sigma) and incubated using a second anti-human IFNγ antibody (0.3 µg/ml biotinylated Mab-7-B6-1 in PBS+1% FCS, Mabtech) for 2 hours at room temperature (RT), Extravidin-Alkaline Phosphatase (1 µg/ml in PBS+1% FCS, Sigma) for 1 hour at RT and the spots were developed by addition of BCIP/NBT-Alkaline phosphatase substrate (one tablet dissolved in water (B. Braun)) for a few minutes, after which the color process was stopped by washing with tap water. The spots were counted by a fully automated computer-assisted-video-imaging analysis system (BioSys 5000 ELISPOT reader, BioSys, Karben, Germany) according to the SOP. The set of parameters were optimized by comparing wells with non-stimulated cells with those with antigen-stimulated cells (spot size 65-450 µm, median steep color intensity gradient, sensitivity 81%, circularity 2.2) (4). Specific spots were calculated by subtracting the mean number of spots in quadruplicate wells plus 2 x SD of the medium only control from the mean number of spots in experimental wells. A positive antigen-specific T-cell frequencies was defined when the specific T-cell frequencies increased 1/10,000 PBMCs. A vaccine-induced T-cell response showed an at least 3-fold higher T-cell frequency compared to those prior to vaccination.

**Direct ex-vivo CD8+ T-cell IFNγ**-**ELISPOT.** Due to limited numbers of PBMC available, the patient’s post-vaccination PBMC were first expanded by peptide stimulation and subjected to the intracellular cytokine staining (as described below) to determine which of the peptide pools were recognized by the CD8+ T cells of each patient. Then, these peptide pools were tested in pre- and post-vaccination samples using the direct ex-vivo CD8+ T-cell IFNγ-ELISPOT assay to assess the primary endpoint. The SOP of the standard overnight IFNγ-ELISPOT assay is available on <http://www.cimt.eu/workgroups/cip/proficiency>. In short, PBMCs were thawed and diluted to a concentration of 4-5 million cells/ml in X-Vivo 15 medium . First medium (as negative control in 6 wells), peptide pools (3 µg/ml per peptide in triplicate wells) or phytohaemagglutinin (PHA, Remel, Thermo Scientific, Breda, the Netherlands; 1.5 µg/ml as positive staining control in a single well) were added at 50 µl/well to the anti-human IFNγ antibody (Mab-1-D1K) coated ELISPOT plates. The peptides used were 15 HPV16 E6 and 9 HPV16 E7 10-aa peptide pools (3). Then, 100 µl/well of the PBMCs (i.e. 400,000 to 500,000 cells/well) were added resulting in a 3-fold lower final concentration of the peptide pools and PHA. The plates were incubated overnight at 37oC in the incubator (5% CO2, 90% humidity). Spots were developed as described above and counted using the BioSys 5000 ELISPOT reader. The HPV16-specific CD8+ T-cell responses were objectively determine positive or negative by using a web-based algorithm for response determination which makes use of the distribution free resampling (DFR2x) (<http://www.scharp.org/zoe/runDFR/>) (5). T-cell frequencies were considered to be boosted by the vaccine when they were at least 3-fold higher than those prior to vaccination.

**Intracellular Cytokine Staining.** PBMCs samples were first stimulated with 22-aa peptides (2.5 µg/ml per peptide) for 10 days as published before (3) to enrich the HPV16-specific T cells before the cells were subjected to ICS. Within each sample both CD4+ (overnight stimulated with 22-aa peptide pools) and CD8+ (using 10-aa peptide pools) T cells were analysed for their production of IFNγ as well as the activation markers CD137 for CD8+ T cells and CD154 for CD4+ T cells. A positive response is defined as at least twice the percentage of IFNγ-producing CD4+ (or CD4+CD154+) or CD8+ (or CD8+CD137+) T cells in the medium only control and with a significantly higher number of events showing a distinguishable population of IFNγ-producing cells separated from the non-producing cells. A vaccine-induced reaction is defined as at least a 3-fold increase in the percentage of antigen-specific IFNγ-producing T cells prior to vaccination.

**Regulatory T-cell assay.**The detection of regulatory T cells (Tregs) was performed as described previously (3). In short, 5 x 105 PBMCs were stimulated with either HPV16 E6 or E7 peptide pool (5 µg/ml per peptide) for 7 days after which the cells were stained for CD3 (clone SK7, BD, Breda, the Netherlands), CD4 (clone SK3, BD), CD8 (clone SK1, BD), CD25 (clone 2A3, BD) and FoxP3 (clone 206D, Biolegend, Antwerpen, Belgium). Unstimulated (cells in medium only) and isotype antibody (mouse IgG1, clone MOPC-21, Biolegend) were taken along as controls. The FoxP3 staining buffer set (eBiosciences San Diego, USA) was used according to the manufacturer’s instructions. The frequencies of medium only control were subtracted from those obtained when the cells were stimulated with HPV16 E6 or E7 to obtain the frequencies of CD4+CD25+ (effector) T cells and CD4+CD25+FoxP3+ (Treg) T cells. Only post-vaccination PBMC samples were tested.

**Basophil activation assay.** Freshly drawn venous blood was directly used in the basophil activation assay as described previously (6). In short, erythrocytes were removed from the freshly obtained 18 mL heparinized whole blood by HetaSep (Stemcell technologies, Grenoble, France) gravidity sedimentation. The harvested leukocytes were incubated for 20 minutes at 37oC (in duplicate) with the following stimuli: Hank’s Balanced Salt Solution (HBSS, Invitrogen, Life Technologies, Bleiswijk, the Netherlands) as negative control, 1 µg/ml mouse anti-human IgE (Clone G7-18, BD) as positive control for IgE dependent stimulation, 1 µg/ml N-formyl-Met-Leu-Phe (fMLP; Sigma) as positive control for IgE non-dependent stimulation, Montanide ISA 51 (Seppic, Putteaux, France; 0.01-1%) only, 0.05-1 µg/ml of each individual peptide as present in the vaccine ISA101, each individual peptide (0.25 µg/ml) 1:1 admixed with Montanide ISA 51, the peptides mixed (0.02-0.2 µg/ml) and the complete vaccine formulation (20 / 30 / 50 v/v/v(%) peptide in DMSO / 20mM PBS (pH 7.5) / Montanide ISA-51) with a concentration per peptide of 0.2 µg/ml. Hereafter the cells were washed and stained (20 minutes on ice) with the following antibodies: FcεRI (clone AER-87, eBiosciences), CD63 (clone H5C6, BD), CD123 (clone 7G3, Miltenyi, Bergisch Gladbach, Germany) and CD203c (clone FR 3-16A11, Miltenyi). In the duplicate sample CD63 staining was replaced by isotype control antibody (clone X40, BD), washed and fixed in 1% paraformaldehyde after which the samples were acquired by flow cytometry (BD FACSCalibur). Analysis was performed using BD FACSDiva software (version 6.2). In the FSC-SSC plot the lymphocytes were selected followed by double positive gating on the CD123 and CD203c after which FcεRI is plotted against CD63. The basophils are CD123+ CD203+ and FcεRI+ and those expressing CD63 are the activated basophils able to degranulate and causing an allergic reaction (7).

**Statistics.**For the clinical efficacy and safety parameters, differences between treatment groups for quantitative variables were evaluated using a Student t-test for normally distributed variables or a Mann Whitney test for skewed distributed variables. For qualitative parameters, overall differences were evaluated using Fisher’s exact test (dichotomous response) or Chi-square test (exact when indicated). The statistical analysis and reporting was done using SAS® for WindowsTM version 9.3 (Cary, N.C.).

The strength of the immune response was defined as the median outcome of the indicated immunological assay for the 6 peptide pools per patient of all patients within a group (3). Since the strength of the responsiveness to the different peptide pools (albeit biologically unrelated) within a patient may be related to overall better fitness of the immune system, potential differences in the strength of the immune response between defined patient groups were analyzed using a linear mixed model with unstructured correlation metric as covariance type to test the relation between the post-vaccination immune response with two different factors (e.g. treatment and peptide pools) and as co-variate the pre-vaccination response using SPSS statistics version 20.

*Laboratory environment.* Immunomonitoring was performed in the laboratory of the department of Clinical Oncology (LUMC) that operates under research conditions, following SOPs, with pre-established definitions of positive responses and using trained personnel. This laboratory has been externally and internally audited according to the reflection paper for laboratories that perform immunomonitoring (8) and participated in all proficiency panels of the CIMT Immunoguiding Program (CIP; of which SHvdB and MJPW are steering committee members; <http://www.cimt.eu/workgroups/cip/>) as well as many of the proficiency panels (including gating and reading panels) of the USA-based Cancer Immunotherapy Consortium (CIC of the Cancer Research Institute) to validate its SOPs.

**Table S1. Reasons for exclusion of patients from outcome analysis**

| **Outcome analysis** | **Number of patients**  (%)1 (ID)2  **ISA101 + imiquimod**  (N=17) | **Number of patients**  (%)1 (ID)2  **ISA101**  (N=22) |
| --- | --- | --- |
| **Immunological response-ITT analysis** | **13** | **18** |
| Not meeting inclusion criteria | 1 (6%) (8) |  |
| No post vaccination blood sample | 1 (6%) (13) | 1 (5%) (56) |
| Insufficient numbers of PBMC | 2 (12%) (16, 32) | 3 (14%) (18, 26, 31) |
|  |  |  |
| **Immunological response-PP analysis** | **10** | **14** |
| Not meeting inclusion criteria | 1 (6%) (8) |  |
| Less than 3 vaccinations | 3 (18%) (13, 16, 32) | 3 (14%) (26, 31, 56) |
| Insufficient numbers of PBMC |  | 1 (6%) (18) |
| >5 weeks between vaccinations | 3 (18%) (9, 22, 58) | 4 (18%) (10,11, 24, 57) |
|  |  |  |
|  |  |  |
| **Clinical efficacy-ITT analysis** | **13** | **21** |
| Not meeting inclusion criteria | 1 (6%) (8) |  |
| No efficacy assessment | 3 (18%) (4, 13, 16) | 1 (5%) (56) |
|  |  |  |
| **Clinical efficacy-3 months PP analysis *** | **8** | **14** |
| Not meeting inclusion criteria | 1 (6%) (8) |  |
| Less than 3 vaccinations | 1 (6%) (32) | 3 (15%) (26, 31, 56) |
| >5 weeks between vaccinations | 3 (18%) (9, 22, 58) | 4 (18%) (10, 11, 24, 57) |
| Date FU not 10-16 weeks | 1 (6%) (12) |  |
| Other therapy |  | 1 (5%) (2) |
| No efficacy assessment | 3 (18%) (4, 13, 16) |  |
|  |  |  |
| **Clinical efficacy-12 months PP analysis *** | **7** | **5** |
| Not meeting inclusion criteria | 1 (6%) (8) |  |
| Less than 3 vaccinations | 1 (6%) (32) | 3 (14%) (26, 31, 56) |
| >5 weeks between vaccinations | 3 (18%) (9, 22, 58) | 4 (18%) (10, 11, 24, 57) |
| Date FU not 48-60 weeks | 1 (6%) (1) | 7 (32%) (3, 19, 20, 21, 51, 62, 63) |
| Other therapy | 1 (6%) (60) | 3 (14%) (2, 17, 18) |
| No efficacy assessment | 3 (18%) (4, 13, 16) |  |

1 % of patients who received at least one vaccination.

2ID, patient identification number.

* more than one reason possible.

**Table S2. Summary statistics of patient groups according to linear mixed model analysis**

| **A** |  | |  | |  | **Histology** | | | | |  | **Virology** | | | | |  | **Clinical** | | | | |  | **BOR** | | |
| --- | --- | --- | --- | --- | --- | --- | --- | --- | --- | --- | --- | --- | --- | --- | --- | --- | --- | --- | --- | --- | --- | --- | --- | --- | --- | --- |
| **Immune assay** | **No. of vacc.** | | **treatment** | |  | 3M | | | 12M | |  | 3M | | | 12M | |  | 3M | | | 12M | |  | 12M | | |
| IFNγ ELISPOT | 2 | | *0.690 (35)* | |  | *0.129 (34)* | | | *0.168 (21)* | |  | *0.183 (34)* | | | **0.098 (20)** | |  | **0.072 (34)** | | | *0.112 (27)* | |  | **0.071 (32)** | | |
|  | 4 | | *0.661 (32)* | |  | *0.258 (31)* | | | *0.142 (19)* | |  | *0.258 (31)* | | | *0.377 (19)* | |  | *0.530 (31)* | | | *0.538 (24)* | |  | *0.889 (29)* | | |
| LST | 2 | | *0.589 (36)* | |  | *0.360 (34)* | | | *0.606 (21)* | |  | *0.577 (34)* | | | *0.834 (20)* | |  | *0.513 (34)* | | | *0.173 (27)* | |  | *0.520 (32)* | | |
|  | 4 | | *0.973 (32)* | |  | *0.301 (31)* | | | **0.051 (19)** | |  | *0.301 (31)* | | | **0.026 (19)** | |  | *0.136 (31)* | | | *0.717 (24)* | |  | *0.351 (29)* | | |
| IFNγ | 2 | | *0.604 (36)* | |  | *0.736 (34)* | | | *0.712 (21)* | |  | *0.295 (34)* | | | *0.923 (20)* | |  | *0.666 (34)* | | | *0.901 (27)* | |  | *0.220 (32)* | | |
|  | 4 | | *0.870 (32)* | |  | *0.989 (31)* | | | *0.263 (19)* | |  | *0.989 (31)* | | | *0.299 (19)* | |  | *0.419 (31)* | | | *0.305 (24)* | |  | **0.044 (29)** | | |
| TNFα | 2 | | *0.723 (36)* | |  | *0.150 (34)* | | | *0.157 (21)* | |  | **0.094 (34)** | | | *0.242 (20)* | |  | *0.154 (34)* | | | *0.413 (27)* | |  | **0.028 (32)** | | |
|  | 4 | | *0.445 (32)* | |  | **0.040 (31)** | | | **0.032 (19)** | |  | **0.040 (31)** | | | **0.048 (19)** | |  | **0.033 (31)** | | | *0.243 (24)* | |  | **0.006 (29)** | | |
| IL-10 | 2 | | *0.398 (36)* | |  | *0.232 (34)* | | | **0.019 (21)** | |  | *0.269 (34)* | | | **0.082 (20)** | |  | **0.026 (34)** | | | **0.005 (27)** | |  | **0.009 (32)** | | |
|  | 4 | | *0.668 (32)* | |  | *0.728 (31)* | | | **0.040 (19)** | |  | *0.728 (31)* | | | *0.192 (19)* | |  | *0.191 (31)* | | | *0.137 (24)* | |  | *0.201 (29)* | | |
| IL-5 | 2 | | *0.662 (36)* | |  | *0.499 (34)* | | | **0.063 (21)** | |  | *0.463 (34)* | | | **0.079 (20)** | |  | *0.349 (34)* | | | *0.104 (27)* | |  | **0.013 (32)** | | |
|  | 4 | | *0.577 (32)* | |  | *0.711 (31)* | | | **0.064 (19)** | |  | *0.711 (31)* | | | 0.117 (19) | |  | *0.403 (31)* | | | *0.476 (24)* | |  | *0.142 (29)* | | |
|  |  | |  | |  |  | | |  | |  |  | | |  | |  |  | | |  | |  |  | | |
|  | |  | |  | | |  |  | |  | | |  |  | |  | | |  |  | |  | | |  |  | |

|  | | |  | |  | | |  |  | |  | | |  |  | |  | | |  |  | |  | | |  |  | |
| --- | --- | --- | --- | --- | --- | --- | --- | --- | --- | --- | --- | --- | --- | --- | --- | --- | --- | --- | --- | --- | --- | --- | --- | --- | --- | --- | --- | --- |
| **B** | | |  | |  | |  | **Histology** | | | | |  | **Virology** | | | | |  | **Clinical** | | | | |  | **BOR** | | |
| **Immune assay** | | | **No. of vacc.** | | **treatment** | |  | 3M | | | 12M | |  | 3M | | | 12M | |  | 3M | | | 12M | |  | 12M | | |
| IFNγ ELISPOT | | | 2 | | *0.497 (25)* | |  | *0.329 (24)* | | | *0.175 (15)* | |  | *0.329 (24)* | | | *0.102 (15)* | |  | **0.086 (24)** | | | *0.356 (17)* | |  | **0.096 (22)** | | |
|  | | | 4 | | *0.962 (25)* | |  | *0.367 (24)* | | | *0.177 (15)* | |  | *0.367 (24)* | | | *0.406 (15)* | |  | *0.527 (24)* | | | *0.374 (17)* | |  | *0.793 (22)* | | |
| LST | | 2 | | | *0.666 (25)* | |  | *0.593 (24)* | | | *0.926 (15)* | |  | *0.593 (24)* | | | *0.523 (15)* | |  | *0.786 (24)* | | | **0.034 (17)** | |  | *0.984 (22)* | | |
|  | | 4 | | | *0.806 (25)* | |  | *0.225 (24)* | | | *0.238 (15)* | |  | *0.225 (24)* | | | *0.179 (15)* | |  | **0.063 (24)** | | | *0.774 (17)* | |  | *0.487 (22)* | | |
| IFNγ | | 2 | | | *0.590 (25)* | |  | *0.581 (24)* | | | *0.524 (15)* | |  | *0.581 (24)* | | | *0.683 (15)* | |  | *0.559 (24)* | | | *0.658 (17)* | |  | *0.180 (22)* | | |
|  | | 4 | | | *0.976 (25)* | |  | *0.883 (24)* | | | *0.376 (15)* | |  | *0.883 (24)* | | | *0.428 (15)* | |  | 0.425 (24) | | | *0.277 (17)* | |  | **0.037 (22)** | | |
| TNFα | | 2 | | | *0.718 (25)* | |  | *0.207 (24)* | | | **0.094 (15)** | |  | *0.207 (24)* | | | *0.168 (15)* | |  | *0.115 (24)* | | | *0.243 (17)* | |  | **0.019 (22)** | | |
|  | | 4 | | | *0.515 (25)* | |  | **0.055 (24)** | | | **0.057 (15)** | |  | **0.055 (24)** | | | **0.066 (15)** | |  | **0.014 (24)** | | | *0.196 (17)* | |  | **0.005 (22)** | | |
| IL-10 | | 2 | | | *0.869 (25)* | |  | *0.941 (24)* | | | **0.046 (15)** | |  | *0.941 (24)* | | | *0.131 (15)* | |  | *0.194 (24)* | | | *0.234 (17)* | |  | *0.154 (22)* | | |
|  | | 4 | | | *0.546 (25)* | |  | *0.626 (24)* | | | **0.029 (15)** | |  | *0.626 (24)* | | | *0.187 (15)* | |  | *0.199 (24)* | | | *0.154 (17)* | |  | *0.276 (22)* | | |
| IL-5 | | 2 | | | *0.930 (25)* | |  | *0.727 (24)* | | | **0.089 (15)** | |  | *0.727 (24)* | | | *0.119 (15)* | |  | *0.331 (24)* | | | **0.066 (17)** | |  | **0.022 (22)** | | |
|  | | 4 | | | *0.596 (25)* | |  | *0.573 (24)* | | | *0.127 (15)* | |  | *0.573 (24)* | | | *0.215 (15)* | |  | *0.372 (24)* | | | 0.485 (17) | |  | *0.121 (22)* | | |

Displayed are the p-values as determined in the Linear Mixed Model for each factor (treatment, histology, virology, clinical and BOR) and after 2 or 4 vaccinations plus the number of Intention to Treat (ITT in table (A) or Per Protocol (PP in table (B)) patients analyzed between brackets at 3 (3M) and 12(12M) months of follow-up. Nearly significant p-values (≤ 0.1) as well as the significant ones (< 0.05) are given in bold. BOR, Best Overall Response; CBA, cytometric bead array; LST, lymphocyte Stimulation Test; Th ELISPOT, T helper ELISPOT assay. Note that the results of the one patient who received 3 instead of 4 vaccinations is included in the analysis of 4 vaccinations.

**Table S3. All related systemic adverse events by study group***

|  | **ISA101**  **+ Imiquimod**  (N=17) | | |  |  | | **ISA101**  (N=22) | | | | **Total**  (N=39) | |
| --- | --- | --- | --- | --- | --- | --- | --- | --- | --- | --- | --- | --- |
| **System-Organ Class**  Preferred term | **n1** | **E2** | **%3** |  | **n1** | **E2** | | **%3** |  | **n1** | **E2** | **%3** |
| Total | 16 | 101 | 94.1% |  | 21 | 145 | | 95.5% |  | 37 | 246 | 94.9% |
| **Blood and lymphatic system disorders** | **1** | **1** | **5.9%** |  | **3** | **3** | | **13.6%** |  | **4** | **4** | **10.3%** |
| Lymphadenopathy | 1 | 1 | 5.9% |  | 3 | 3 | | 13.6% |  | 4 | 4 | 10.3% |
| **Gastrointestinal disorders** | **8** | **17** | **47.1%** |  | **8** | **14** | | **36.4%** |  | **16** | **31** | **41.0%** |
| Nausea | 8 | 13 | 47.1% |  | 7 | 8 | | 31.8% |  | 15 | 21 | 38.5% |
| Vomiting | 3 | 4 | 17.6% |  | 5 | 6 | | 22.7% |  | 8 | 10 | 20.5% |
| **General disorders and administration site conditions** | **15** | **53** | **88.2%** |  | **21** | **79** | | **95.5%** |  | **36** | **132** | **92.3%** |
| Chills | 1 | 1 | 5.9% |  | 3 | 7 | | 13.6% |  | 4 | 8 | 10.3% |
| Fatigue | 10 | 19 | 58.8% |  | 9 | 13 | | 40.9% |  | 19 | 32 | 48.7% |
| Influenza like illness | 11 | 25 | 64.7% |  | 16 | 32 | | 72.7% |  | 27 | 57 | 69.2% |
| Malaise | 1 | 1 | 5.9% |  | 2 | 5 | | 9.1% |  | 3 | 6 | 7.7% |
| Pyrexia | 5 | 7 | 29.4% |  | 11 | 22 | | 50.0% |  | 16 | 29 | 41.0% |
| **Immune system disorders** | **3** | **4** | **17.6%** |  | **4** | **5** | | **18.2%** |  | **7** | **9** | **17.9%** |
| Hypersensitivity | 2 | 2 | 11.8% |  | 2 | 3 | | 9.1% |  | 4 | 5 | 10.3% |
| Urticaria | 1 | 2 | 5.9% |  | 2 | 2 | | 9.1% |  | 3 | 4 | 7.7% |
| **Infections and infestations** | **0** | **0** | **0** |  | **1** | **1** | | **4.5%** |  | **1** | **1** | **2.6%** |
| Influenza | 0 | 0 | 0 |  | 1 | 1 | | 4.5% |  | 1 | 1 | 2.6% |
| **Metabolism and nutrition disorders** | **1** | **1** | **5.9%** |  | **0** | **0** | | **0** |  | **1** | **1** | **2.6%** |
| Decreased appetite | 1 | 1 | 5.9% |  | 0 | 0 | | 0 |  | 1 | 1 | 2.6% |
| **Musculoskeletal and connective tissue disorders** | **4** | **7** | **23.5%** |  | **5** | **11** | | **22.7%** |  | **9** | **18** | **23.1%** |
| Arthralgia | 0 | 0 | 0 |  | 1 | 1 | | 4.5% |  | 1 | 1 | 2.6% |
| Groin pain | 0 | 0 | 0 |  | 1 | 1 | | 4.5% |  | 1 | 1 | 2.6% |
| Musculoskeletal chest pain | 1 | 1 | 5.9% |  | 0 | 0 | | 0 |  | 1 | 1 | 2.6% |
| Musculoskeletal stiffness | 2 | 2 | 11.8% |  | 0 | 0 | | 0 |  | 2 | 2 | 5.1% |
| Myalgia | 1 | 1 | 5.9% |  | 4 | 4 | | 18.2% |  | 5 | 5 | 12.8% |
| Pain in extremity | 1 | 3 | 5.9% |  | 1 | 5 | | 4.5% |  | 2 | 8 | 5.1% |
| **Nervous system disorders** | **7** | **12** | **41.2%** |  | **9** | **21** | | **40.9%** |  | **16** | **33** | **41.0%** |
| Dizziness | 2 | 3 | 11.8% |  | 5 | 7 | | 22.7% |  | 7 | 10 | 17.9% |
| Headache | 4 | 7 | 23.5% |  | 6 | 11 | | 27.3% |  | 10 | 18 | 25.6% |
| Paraesthesia | 1 | 1 | 5.9% |  | 0 | 0 | | 0 |  | 1 | 1 | 2.6% |
| Somnolence | 1 | 1 | 5.9% |  | 1 | 3 | | 4.5% |  | 2 | 4 | 5.1% |
| **Skin and subcutaneous tissue disorders** | **4** | **6** | **23.5%** |  | **6** | **10** | | **27.3%** |  | **10** | **16** | **25.6%** |
| Pruritus | 4 | 6 | 23.5% |  | 4 | 6 | | 18.2% |  | 8 | 12 | 20.5% |
| Rash | 0 | 0 | 0 |  | 3 | 4 | | 13.6% |  | 3 | 4 | 7.7% |
| **Vascular disorders** | **0** | **0** | **0** |  | **1** | **1** | | **4.5%** |  | **1** | **1** | **2.6%** |
| Hypotension | 0 | 0 | 0 |  | 1 | 1 | | 4.5% |  | 1 | 1 | 2.6% |

Adverse events of the number of patients exposed (N) are reported by attribution using CTCAE version 3.0 criteria. The number and incidence of adverse events are sorted by treatment group, category and type of toxicity. Attributions of treatment of possible, probable, or definitely were categorized as related.

*There were no significant differences in adverse events between the two treatment arms.

1n = Number of patients that experienced an adverse events.

2E = Number of adverse events that occurred.

3% = Percentage is based on the number of patients in the treatment group and represent the % of patients experiencing each type of event (n/N).

**Table S****4. Swelling size of injection site at 12 months follow-up (safety population)***

| **Vaccination**1 | **Size** | **ISA101+**  **Imiquimod**  (N=17) | **ISA101**  (N=22) | **Total**  (N=39) |
| --- | --- | --- | --- | --- |
| 1st vaccination - left | 0 cm | 4 (33.3%) | 6 (28.6%) | 10 (30.3%) |
|  | <5 cm | 7 (58.3%) | 13 (61.9%) | 20 (60.6%) |
|  | 5-10 cm | 1 (8.3%) | 2 (9.5%) | 3 (9.1%) |
|  | >10 cm | 0 | 0 | 0 |
|  | N2 | 12 | 21 | 33 |
| 1st vaccination - right | 0 cm | 5 (41.7%) | 7 (33.3%) | 12 (36.4%) |
|  | <5 cm | 7 (58.3%) | 13 (61.9%) | 20 (60.6%) |
|  | 5-10 cm | 0 | 1 (4.8%) | 1 (3.1%) |
|  | >10 cm | 0 | 0 | 0 |
|  | N2 | 12 | 21 | 33 |
| 2nd vaccination - left | 0 cm | 3 (25.0%) | 7 (33.3%) | 10 (30.3%) |
|  | <5 cm | 8 (66.7%) | 10 (47.6%) | 18 (54.6%) |
|  | 5-10 cm | 1 (8.3%) | 4 (19.1%) | 5 (15.2%) |
|  | >10 cm | 0 | 0 | 0 |
|  | N2 | 12 | 21 | 33 |
| 2nd vaccination - right | 0 cm | 4 (33.3%) | 6 (28.6%) | 10 (30.3%) |
|  | <5 cm | 7 (58.3%) | 15 (71.4%) | 22 (66.7%) |
|  | 5-10 cm | 1 (8.3%) | 0 | 1 (3.0%) |
|  | >10 cm | 0 | 0 | 0 |
|  | N2 | 12 | 21 | 33 |
| 3rd vaccination - left | 0 cm | 3 (27.3%) | 6 (31.6%) | 9 (30.0%) |
|  | <5 cm | 8 (72.7%) | 12 (63.2%) | 20 (66.7%) |
|  | 5-10 cm | 0 | 1 (5.3%) | 1 (3.3%) |
|  | >10 cm | 0 | 0 | 0 |
|  | N2 | 11 | 19 | 30 |
| 3rd vaccination - right | 0 cm | 4 (36.4%) | 8 (42.1%) | 12 (40.0%) |
|  | <5 cm | 7 (63.6%) | 11 (57.9%) | 18 (60.0%) |
|  | 5-10 cm | 0 | 0 | 0 |
|  | >10 cm | 0 | 0 | 0 |
|  | N2 | 11 | 19 | 30 |
| 4th vaccination - left | 0 cm | 2 (18.2%) | 4 (23.5%) | 6 (21.4%) |
|  | <5 cm | 9 (81.8%) | 10 (58.8%) | 19 (67.9%) |
|  | 5-10 cm | 0 | 3 (17.7%) | 3 (10.7%) |
|  | >10 cm | 0 | 0 | 0 |
|  | N2 | 11 | 17 | 28 |
| 4th vaccination - right | 0 cm | 3 (27.3%) | 6 (35.3%) | 9 (32.1%) |
|  | <5 cm | 8 (72.7%) | 11 (64.7%) | 19 (67.9%) |
|  | 5-10 cm | 0 | 0 | 0 |
|  | >10 cm | 0 | 0 | 0 |
|  | N2 | 11 | 17 | 28 |

*There were no significant differences in adverse events between the two treatment arms.

1Injection of the seven E6 SLP vaccine is given in the left limb and the injection of the two E6 SLP and four E7 SLP in the right limb.

2N, number of patients analyzed. If N is smaller than the number of patients in the treatment group, data of the remaining patients is missing.

**Table S5. Overview of treatment-related severe adverse events in patients who received at least one ISA101 vaccination with or without imiquimod**

| **Patient**  **ID**1 | **Treatment**  ISA101 | **Vaccination period of occurrence** | | | **Preferred Term** | | **Study Drug Relationship** | | **Remarks** |
| --- | --- | --- | --- | --- | --- | --- | --- | --- | --- |
| **Injection site adverse events** | | | | | | | | | |
| 9 | + Imiquimod | | 2 | Injection site reaction | | Definitely | | |  |
| 30 |  | | 1 | Injection site reaction | | Definitely | | |  |
|  |  | | 2 | Injection site reaction | | Definitely | | |  |
|  |  | | 3 | Vaccination site ulcer | | Probably | | | SAE |
|  |  | | 3 | Injection site reaction | | Definitely | | |  |
| **Systemic AEs** | | | | | | | | | |
| 9 | + Imiquimod | | 2 | Pyrexia | | Definitely | |  | |
| 26 |  | | 2 | Hypersensitivity | | Probably | | SAE2, patient discontinued from study after second vaccination | |
| 51 |  | | 2 | Influenza like illness | | Probably | |  | |
| 52 |  | | 2 | Influenza like illness | | Probably | |  | |
| 53 | + Imiquimod | | 2 | Influenza like illness | | Probably | |  | |
| 55 | + Imiquimod | | 2 | Influenza like illness | | Probably | |  | |
|  |  | | 3 | Influenza like illness | | Definitely | |  | |
| 59 |  | | 2 | Fatigue | | Definitely | |  | |
|  |  | | 3 | Fatigue | | Probably | |  | |
| 60 | + Imiquimod | | 2 | Influenza like illness | | Definitely | |  | |
|  |  | | 2 | Fatigue | | Definitely | |  | |
| 61 | + Imiquimod | | 2 | Influenza like illness | | Definitely | |  | |
|  |  | | 3 | Headache | | Possibly | |  | |
| 62 |  | | 2 | Influenza like illness | | Probably | |  | |
|  |  | | 4 | Influenza like illness | | Probably | |  | |

1Patient ID, patient identification number.

2SAE, serious adverse event.

**Table S6. Overview of serious adverse events (safety population)**

| **Patient**  **ID**1 | **Treatment**  ISA101 | **Vaccination period of occurrence** | **Preferred Term** | **Severity** | **Study Drug Relationship** | **Action Taken** |
| --- | --- | --- | --- | --- | --- | --- |
| 2 |  | 2 | Hypoglycaemia | - | Not related | None |
|  |  | 3 | Hypoglycaemia | - | Not related | None |
| 24 |  | 2 | Gastritis | Moderate | Remotely | None |
|  |  | 2 | Folate deficiency | Moderate | Remotely | None |
|  |  | 2 | Vitamin B12 deficiency | Moderate | Remotely | None |
| 26 |  | 2 | Hypersensitivity | Severe | Probably | Treatment discontinued |
| 30 |  | 3 | Vaccination site ulcer | Moderate | Probably | Treatment discontinued |
|  |  | 3 | Vaccination site ulcer | Severe | Probably | NA2 |
| 32 | + Imiquimod | 2 | Hypersensitivity | Moderate | Definitely | Treatment discontinued |
| 51 |  | 4 | Vulval operation | Severe | Not related | None |
| 56 |  | 2 | Myocardial infarction | Death related to adverse event | Remotely | NA |
| 57 |  | 1 | Intervertebral disc operation | Severe | Not related | None |
|  |  | 3 | Intervertebral disc operation | Severe | Not related | None |
| 58 | + Imiquimod | 2 | Anxiety | Moderate | Not related | None |
| 60 | + Imiquimod | 4 | Vulval operation | Severe | Not related | None |
| 63 |  | 2 | Pyrexia | Moderate | Definitely | None |
|  |  | 3 | Investigation | Mild | Definitely | None |

1Patient ID, patient identification number.

2NA, not applicable.

**Figure S1. Study Profile**

**Figure S2. Example of detection of HPV16-specific CD8+ T-cell response measured by flow cytometry**

PBMC were gated on single cells, lymphocytes, CD3+ cells and subsequently CD4+ or CD8+ T cells. Responses to HPV16 E6 or E7 peptide pools were measured by activation marker CD137+ and the cytokine production (IFNγ and IL-2) by these T cells using multiparameter flow cytometry analysis. Shown are the frequencies of CD137+ and IFNγ and/or IL-2 producing CD8+ T cells of PBMC bulk cultures stimulated with medium only (negative control), or cells stimulated with the indicated peptide pool.

**Figure S3. Example of detection of HPV16**-**specific CD8+ T**-**cell response measured by ex**-**vivo CD8+ T-cell IFNγ**-**ELISPOT**

PBMCs were thawed and stimulated in triplicate wells with the peptide pools indicated in the ELISPOT plate. Six wells of cells with medium served as negative control, while one well in which the cells were stimulated with the mitogen PHA served as staining control. Shown are the spots per 400,000 cells formed and counted by an automated reader.

**Figure S4. HPV16-specific CD8+ T-cell reactivity of the PP population**

A, The number of positive peptide pools (of a total of 24 peptide pools) recognized by CD8+ T cells after culture per patient as determined by intracellular IFNγ staining. No difference was observed (p=0.27; Fisher’s Exact test) between patients in the two treatment arms.

B, The percentage of patients displaying an ex vivo detectable HPV16-specific CD8+ T-cell response as determined by IFNγ-ELISPOT assay. A non-significant difference was observed (p=0.12; Fisher’s Exact test) between patients in the two treatment arms. Patients are grouped according to their treatment. Black bars: ISA101 vaccination with imiquimod. White bars: ISA101 vaccination.

**Figure S5. No differences in immune response to recall antigens upon treatment**

The response to recall antigens (memory response mix, MRM) was tested and analyzed for the ITT patients. Plotted are box-whiskers, in which the median, interquartile range as well as the minimum and maximum values, are depicted. Left are the measured values for the assays shown for all patients prior to vaccination (pre), after 2 vaccinations (2) and after 4 vaccinations (4). Of note, one patient received 3 instead of 4 vaccinations, hence the results of this time point were used. In the plots to the right for each immune assay the patients are grouped according to the treatment: ISA101+imiquimod is indicated by grey bars; ISA101 by white bars. Paired t-test analysis was performed to determine significant differences between the post-vaccination sample and pre-vaccination sample but revealed no differences. Differences between treatment arms were analyzed by Mann-Whitney and found not significant.

**Figure S6. Strength of the HPV16-specific immunity versus clinical measurements at 12 months follow-up**

The strength of the immune response prior to vaccination (pre), after 2 vaccinations (2) and after 4 vaccinations (4) is depicted when ITT patients were grouped according to presence (open circle) or absence (closed circle) of VIN lesion (histology), HPV16 DNA (virology),a non-CR (NR/PR; open circles) or CR (closed circles) at 12 months after the last vaccination.

**Figure S7. Strength of the HPV16-specific immune responses in the PP population**

**Figure S7. Strength of the HPV16-specific immune responses in the PP population**

A, The strength of the immune response prior to vaccination (pre), after 2 vaccinations (2) and after 4 vaccinations (4) is depicted when PP patients were grouped according to presence (open circle) or absence (closed circle) of VIN lesion (histology), HPV16 DNA (virology),a non-CR (NR/PR; open circles) or CR (closed circles) at 3 months after the last vaccination. In addition, at 12 months the best overall response (BOR) is displayed, closed circles represent a histological cleared lesion and/or a clinical CR of the lesion. Open circles are all other outcomes.

B, The strength of the immune response prior to vaccination is depicted when PP patients were grouped according to clinical measurements at 12 months after the last vaccination.

**Figure S8. Granulomatous dermatitis at ISA101 vaccination site**

A, One patient presented with intermittently tender, slightly indurated violaceous plaques at her right and left upper leg at the injection sites 8 months after the last vaccination. A secondary infection with Staphylococcus aureus occurred with ulceration and drainage of pus. She was referred to a dermatologist and was treated with local wound care, oral antibiotics and intralesional steroids. The ulcerations resolved with scarring of the skin at the vaccination sites.

B, Another patient developed an injection site ulcer at her left leg 3 weeks after the second vaccination. Wound culture revealed a secondary infection with Pseudomonas aeruginosa. The fact that she worked in a butchery may have been associated with the secondary infection. Oral antibiotics and local wound care were without clinical improvement. Hence, a surgical excision was performed. Scarring and retraction of the skin was present 12 months after the last vaccination.

C, Histopathological examination by hematoxylin-eosin stain from the vaccination sites of both patients showed necrotizing granulomatous dermatitis (left picture; magnification 10x) located in the dermis with histiocytes, multinucleated giant cells, and eosinophils surrounding an area of necrotic debris (right picture; magnification 20x).

**Figure S9. Basophil activation assay**

Patient ID19 presented with an allergic reaction. Blood was drawn and directly subjected to the basophil activation assay as a measure to analyze which vaccine components caused basophils to degranulate and subsequent hypersensitivity. PBMC were stimulated with all different single vaccine peptides, Montanide ISA 51, each single peptide in Montanide ISA 51, a mix of all peptides, and this mixture in combination with Montanide ISA 51 (SLP vaccine). The percentage of CD63 expressing CD123+CD203c+FcεRI+ basophils cells are shown as a measure of specifically activated cells in the right upper hand corner of each plot. Shown are the non-stimulated cells (negative control), mouse anti-human IgE stimulated cells (positive control), and the peptides to which positive reactions were detected.

References

1 Britten CM, Janetzki S, Butterfield LH et al., T cell assays and MIATA: the essential minimum for maximum impact. Immunity 2012;37:1-2.

2 van Poelgeest MI, van Seters M, van Beurden M et al., Detection of human papillomavirus (HPV) 16-specific CD4+ T-cell immunity in patients with persistent HPV16-induced vulvar intraepithelial neoplasia in relation to clinical impact of imiquimod treatment. Clin Cancer Res 2005;11:5273-80.

3 Welters MJ, Kenter GG, de Vos van Steenwijk PJ et al., Success or failure of vaccination for HPV16-positive vulvar lesions correlates with kinetics and phenotype of induced T-cell responses. Proc Natl Acad Sci USA 2010;107:11895-99.

4 Janetzki S, Price L, Schroeder H, Britten CM, Welters MJ, Hoos A. Guidelines for the automated evaluation of Elispot assays. Nat Protoc 2015;10:1098-115.

5 Moodie Z, Price L, Gouttefangeas C et al., Response definition criteria for ELISPOT assays revisited. Cancer Immunol Immunother 2010;59:1489-1501.

6 Ebo DG, Sainte-Laudy J, Bridts CH et al., Flow-assisted allergy diagnosis: current applications and future perspectives. Allergy 2006;61:1028-39.

7 Michova A, Abugalia M, Ivanova T, Nikolov G, Taskov H, Petrunov B. Comparision of two-flow cytometry methods for basophil degranulation in patients sensitized to grass pollen. Allergy 2006;61:1078-83.

8 GCP Inspectors Working Group. European Medicines Agency. Reflection paper for laboratories that perform the analysis or evaluation of clinical trial samples. EMA/INS/GCP/532137/2010,1-19.
